# Supplementary material for: Aerosols cause intraseasonal short-term suppression of Indian monsoon rainfall
Source: PubMed Central journal article supplement (PMC5725429; doi:10.1038/s41598-017-17599-1), 2017-12-11
Supplement: 41598_2017_17599_MOESM1_ESM.pdf [file 41598_2017_17599_MOESM1_ESM.pdf]

16 **Supporting text:**

17 **Overall effect of different pathways**

18 When radiative pathway was excluded from the model (Fig. 3) the unexplained variability in  
19 precipitation increased and the increase was of the same order as when column water vapour-  
20 precipitation pathway was excluded for years 2004 and 2009 for HL cluster (Table S2).

21

22 **Effect of surface pressure as common moderator on AOD and VIDMF**

23 In order to investigate the role of surface pressure as a common factor influencing AOD  
24 anomaly and VIDMF anomaly in HL cluster, pairwise causality analysis was performed  
25 amongst surface pressure, AOD anomaly and VIDMF anomaly. It was found that there is no  
26 causal influence of surface pressure anomaly on AOD anomaly. However, statistically  
27 significant causal influence of AOD anomaly on surface pressure anomaly was found for years  
28 2004 and 2005. Along with this, causal influence from VIDMF anomaly to surface pressure  
29 anomaly was detected for year 2009. The absence of causal influence of surface pressure  
30 anomaly on AOD anomaly, rules out the possibility of surface pressure being the driving force  
31 behind observed changes in aerosol and subsequent changes in VIDMF. Further, geopotential  
32 height anomaly at 1000hPa and 750hPa levels was used as proxy to pressure, results obtained  
33 were similar with respect to AOD anomaly i.e. no causal influence of geopotential height  
34 anomaly was obtained on AOD anomaly. It supports the hypothesis of changes in VIDMF  
35 anomaly driven by changes in aerosols anomaly and not by changes in surface pressure  
36 anomaly. Further with varying AOD anomaly threshold it was found that there is increased  
37 divergence of moisture and downward wind in HL cluster as evident from cumulative  
38 distribution of VIDMF and wind anomalies in HL and LL clusters (Supplementary Fig. 6)

39

40

41 **Break analysis**

42 To perform break analysis, precipitation anomaly threshold was identified to define a break  
43 period. The identified threshold was found such that it corresponds to the threshold of -1 when  
44 precipitation is obtained using area average of data<sup>7</sup>. The cumulative distribution of the  
45 precipitation anomaly (Supplementary Fig. 8) for both the approaches were plotted and  
46 precipitation threshold anomaly of -0.37 was obtained to define a break spell. Here, to include  
47 more stringent threshold criteria as well, a 3 day or longer spell with an anomaly threshold  
48 range of -0.37 to -0.4 was examined, corresponding respectively to -1 and -1.2, in terms of  
49 normalised anomaly threshold<sup>7</sup>. These varying anomaly thresholds were used to study the

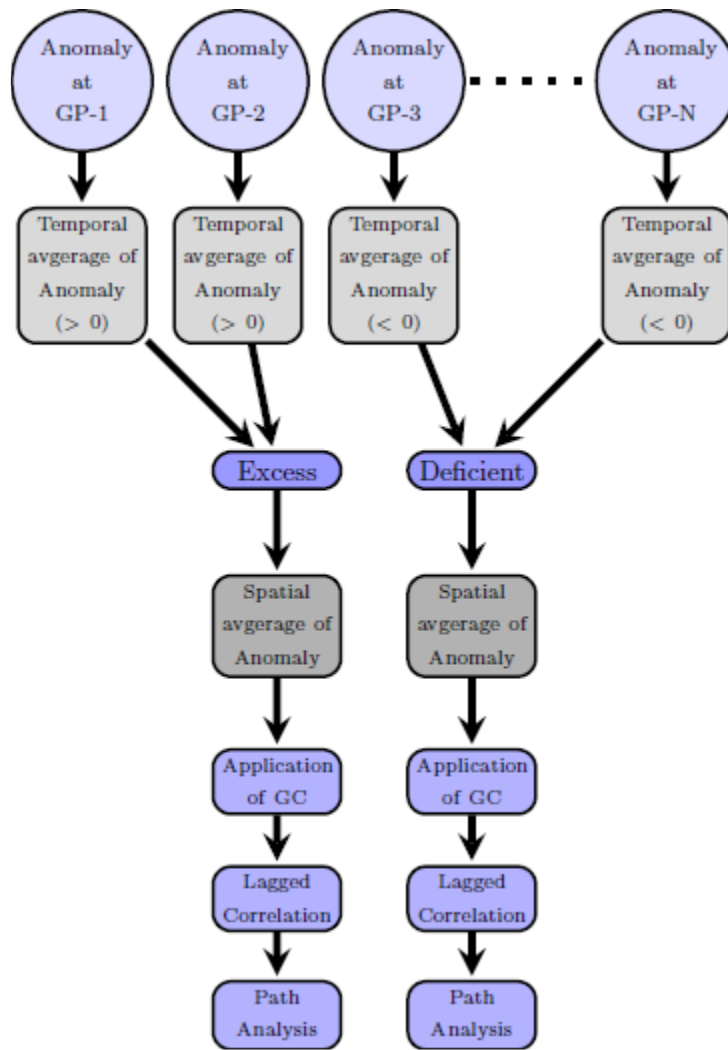

50

51

52 **Figure S1.** Work flow

53

54

55

56

57

58

59

60

61

62

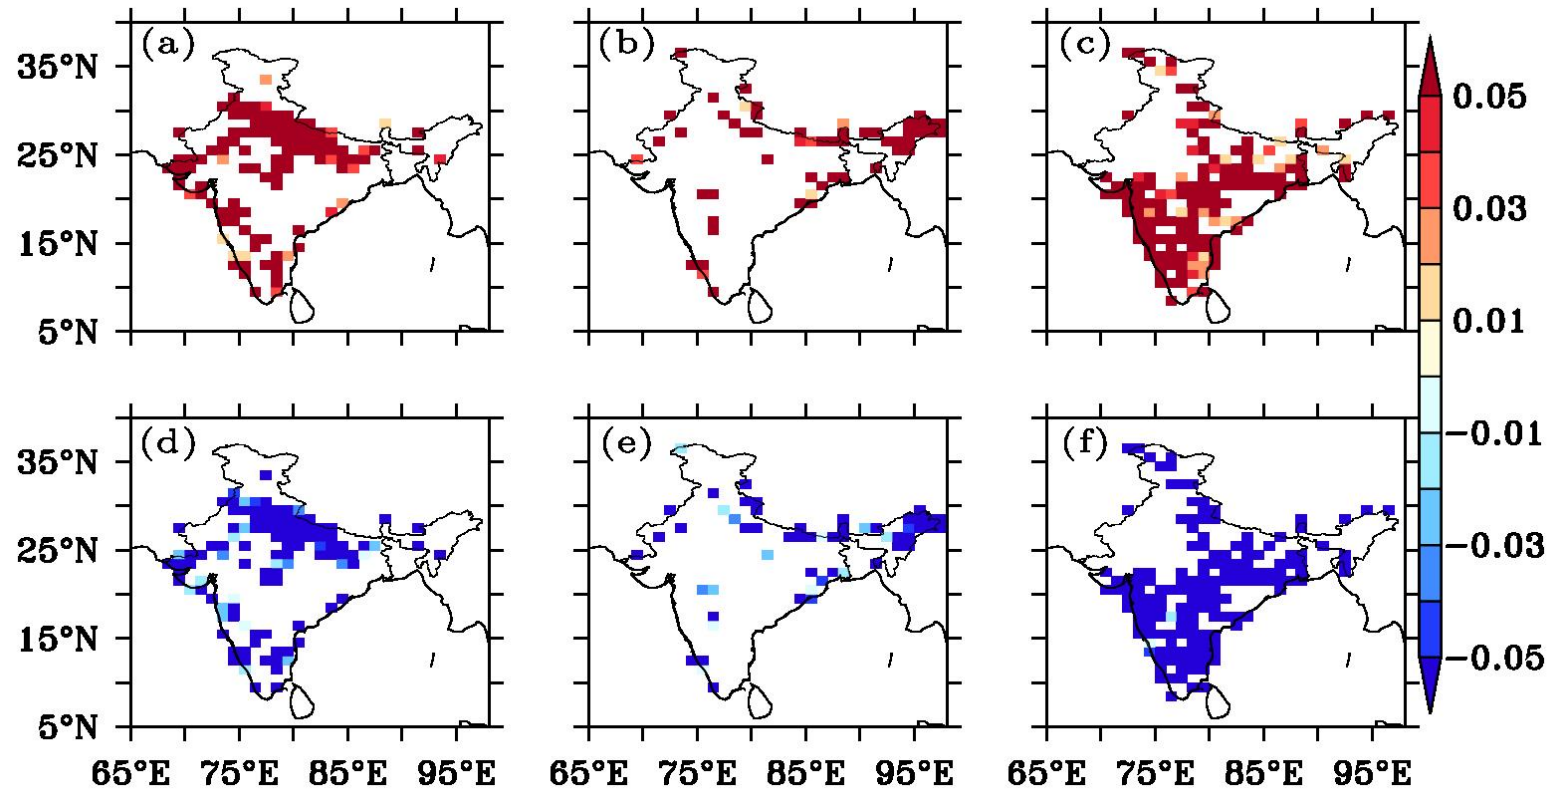

63 **Figure S2.** AOD-Precipitation pixels in individual years in HL cluster: (a) 2004 AOD anomaly (b) 2005 AOD anomaly, (c) 2009 AOD anomaly,

64 (d) 2004 Precipitation anomaly, (e) 2005 Precipitation anomaly and (f) 2009 Precipitation anomaly. Figure was created using FERRET

65 v7.0 (<http://www.ferret.noaa.gov/Ferret/>).

66

67

68

69

70

71

72

73

74

75

76

77

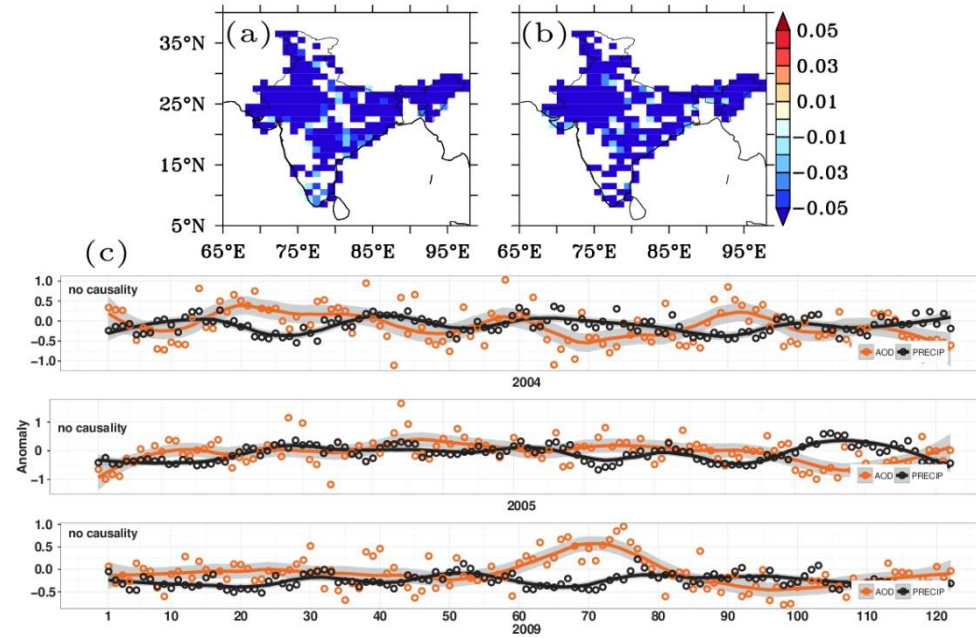

**Figure S3.** Temporally averaged spatial distribution of LL cluster for 2004, 2005 and 2009 in (a) AOD and (b) Precipitation. (c) Cluster averaged temporal series of AOD and Precipitation. Figure was created using R statistical tool v3.3.1 (<https://www.r-project.org/>) and FERRET v7.0 (<http://www.ferret.noaa.gov/Ferret/>)

78

79

80

81

82

83

84

85

86

87

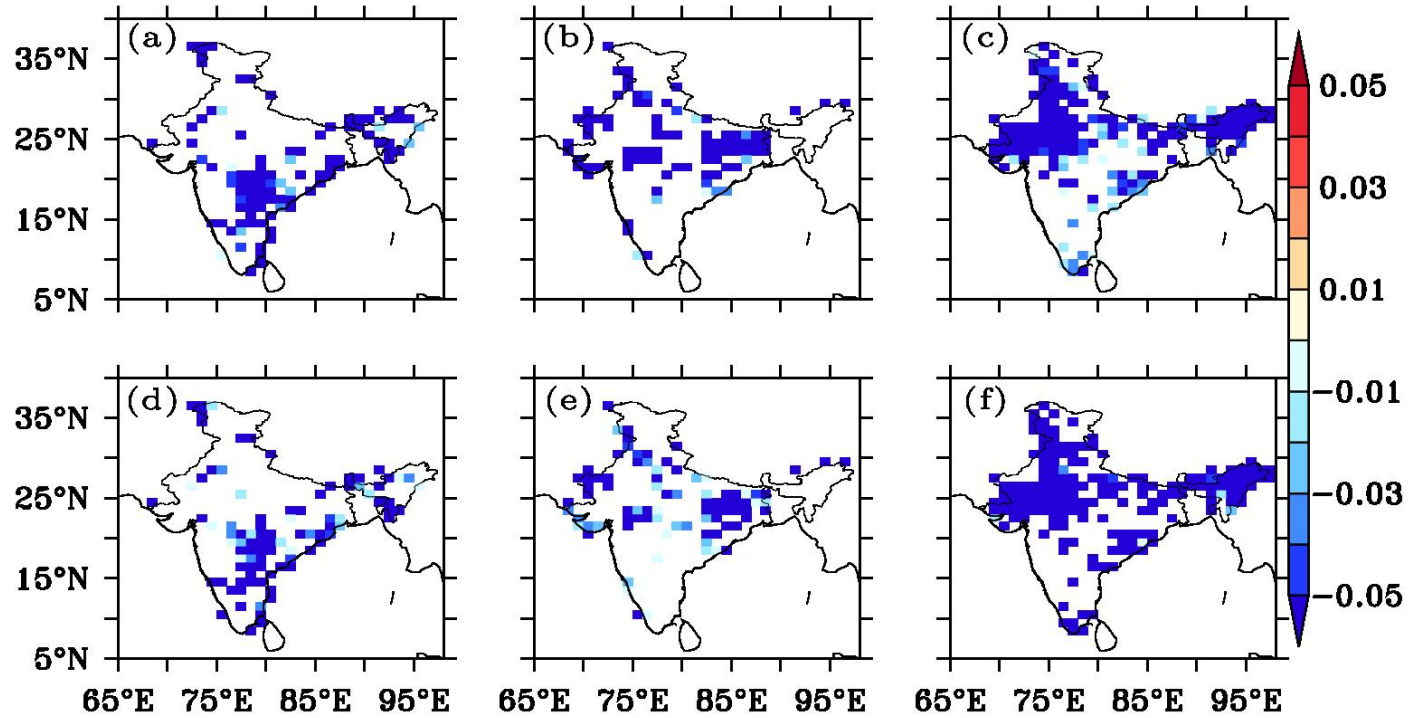

88 **Figure S4.** AOD-Precipitation pixels in individual years in LL cluster: (a) 2004 AOD anomaly (b) 2005 AOD anomaly, (c) 2009 AOD anomaly,

89 (d) 2004 Precipitation anomaly, (e) 2005 Precipitation anomaly and (f) 2009 Precipitation anomaly. Figure was created using FERRET

90 v7.0 (<http://www.ferret.noaa.gov/Ferret/>).

91

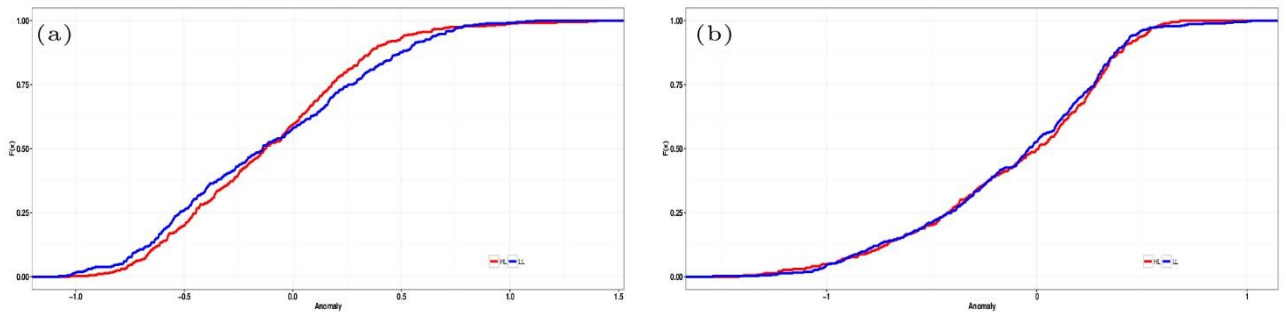

92

93 **Figure S5.** CWV and CF anomaly cumulative distribution for HL and LL clusters. (a) CWV  
94 anomaly and (b) CF anomaly. Figure was created using R statistical tool v3.3.1 ([https://www.r-](https://www.r-project.org/)  
95 [project.org/](https://www.r-project.org/)).

96

97

98

99

100

101



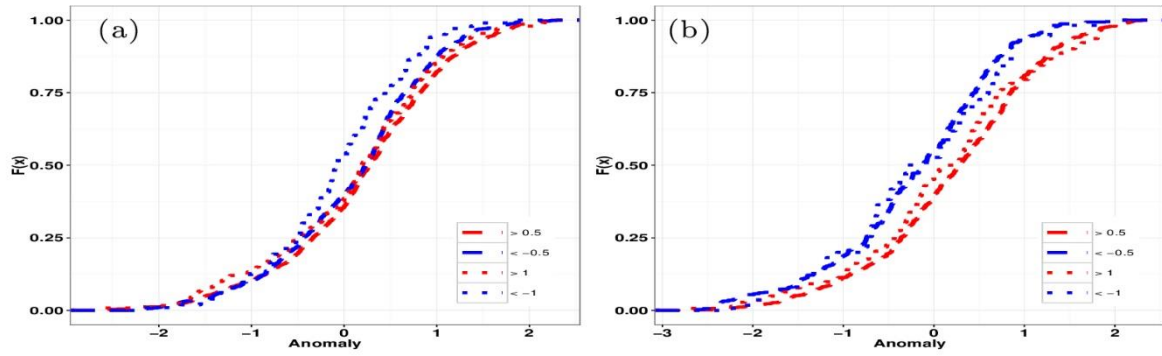

102

103

104 **Figure S6.** VIDMF and  $\omega_{850}$  anomalies with varying AOD threshold. AOD anomaly was kept  
 105 as  $\pm 0.5$  and  $\pm 1$  to select high AOD and low AOD days (consecutive 3-days) legend shows  
 106 AOD anomaly threshold level. (a) VIDMF anomaly and (b)  $\omega_{850}$  anomaly. Figure was created  
 107 using R statistical tool v3.3.1 (<https://www.r-project.org/>).

108

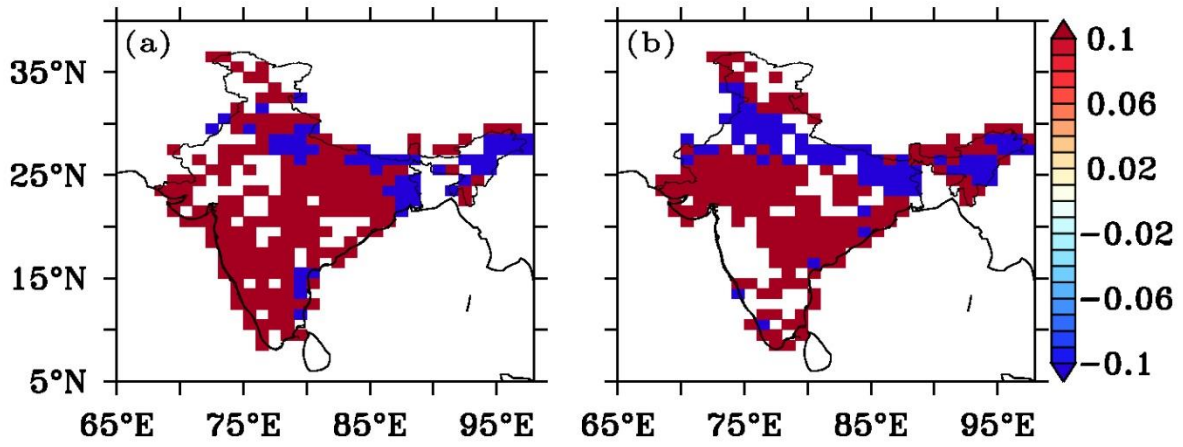

110

111 **Figure S7.** Composite surface pressure anomaly during break days for (a) HL and (b) LL  
112 clusters. Figure was created using FERRET v7.0 (<http://www.ferret.noaa.gov/Ferret/>).

113

114

115

116

117

118

119

120

121

122

123

124

125

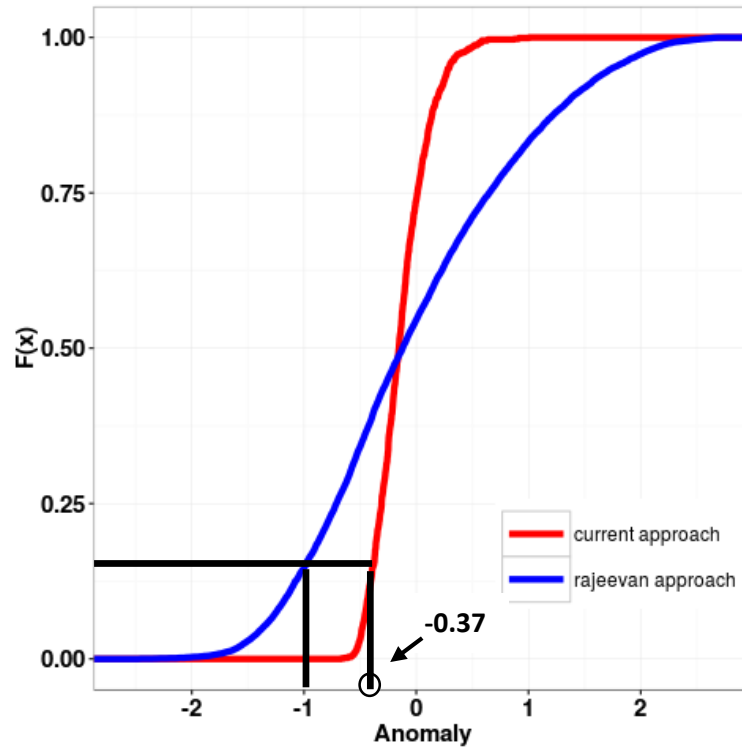

126

127

128 **Figure S8.** Precipitation cumulative distribution function using area averaged anomaly  
129 time series (current approach) and anomaly obtained from area average time series of  
130 data<sup>7</sup>. Figure was created using R statistical tool v3.3.1 (<https://www.r-project.org/>).

131

132

133

134

135

136

137

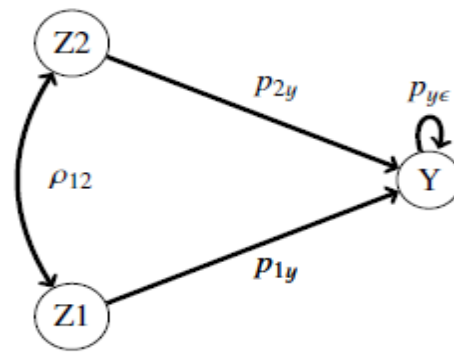

138 **Figure S9:** Path analysis example

139 **Table S1.** Causal influence of different pathways and precipitation  $R^2$

| Pathway               | HL              |                 |                 | LL              |                 |                 |
|-----------------------|-----------------|-----------------|-----------------|-----------------|-----------------|-----------------|
|                       | 2004            | 2005            | 2009            | 2004            | 2005            | 2009            |
| AOD-CDER-PRECIP       | Not significant | -0.035          | Not significant | Not significant | Not significant | Not significant |
| AOD-Lapse rate-PRECIP | -0.172          | Not significant | Not significant | Not significant | Not significant | Not significant |
| AAI-Lapse rate-PRECIP | -0.059          | -0.193          | -0.064          | Not significant | -0.266          | -0.065          |
| CWV-CDER-PRECIP       | 0.169           | Not significant | 0.182           | 0.176           | Not significant | Not significant |
| CWV-PRECIP            | 0.365           | Not significant | 0.214           | Not significant | 0.336           | 0.401           |
| $R^2$ (PRECIP)        | 0.64            | 0.38            | 0.63            | 0.53            | 0.58            | 0.41            |

140

141 **Table S2.** Precipitation  $R^2$  in different models

142

| Pathways           | 2004 |      | 2005 |      | 2009 |      |
|--------------------|------|------|------|------|------|------|
|                    | HL   | LL   | HL   | LL   | HL   | LL   |
| Complete Model     | 0.64 | 0.53 | 0.38 | 0.58 | 0.63 | 0.41 |
| Without Lapse rate | 0.57 | 0.43 | 0.23 | 0.40 | 0.57 | 0.28 |
| Without CDER       | 0.40 | 0.37 | 0.34 | 0.58 | 0.46 | 0.32 |
| Without CWV        | 0.57 | 0.52 | 0.38 | 0.56 | 0.50 | 0.26 |

143

144 **Table S3.** Surface pressure, AOD and VIDFM causality analysis years 2004, 2005 and 2009  
 145 for HL cluster. Lag at which causality exists are listed.

| <b>Pathway</b>       | <b>2004</b>  | <b>2005</b>  | <b>2009</b>  |
|----------------------|--------------|--------------|--------------|
| Sur. Pressure → AOD  | No causality | No causality | No causality |
| AOD → Sr. Pressure   | 1-5          | 2-5          | No causality |
| Sr. Pressure → VIDMF | No causality | No causality | No causality |
| VIDMF → Sr. Pressure | 2            | 1            | 2-5          |
| AOD → VIDMF          | 3-5          | 1-5          | 5            |
| VIDMF → AOD          | No causality | No causality | 2            |

146

147 **Table S4.** List of variables

148

| <b>Variable</b> | <b>Description</b>                               | <b>Units</b>                   | <b>Source</b>                       |
|-----------------|--------------------------------------------------|--------------------------------|-------------------------------------|
| AOD             | Aerosol optical depth                            | <i>Unitless</i>                | MODIS                               |
| AAI             | Aerosol index                                    | <i>Unitless</i>                | TOMS:00-04;OMI:05-09                |
| CDER            | Liquid cloud droplet effective radius            | $\mu m$                        | MODIS                               |
| CWV             | Column water vapour                              | $g/m^2$                        | MODIS                               |
| Lapse rate      | Lapse Rate                                       | $K/km$                         | ERA-interim Reanalysis<br>(derived) |
| $\omega_{850}$  | Vertical wind                                    | $Pa \cdot s^{-1}$              | ERA-interim Reanalysis              |
| VIDMF           | Vertical integral of divergence of moisture flux | $Kg \cdot m^{-2} \cdot s^{-1}$ | ERA-interim Reanalysis              |
| SP              | Surface pressure                                 | $hPa$                          | ERA-interim Reanalysis              |
| PRECIP          | Precipitation                                    | $mm \cdot day^{-1}$            | IMD-gridded                         |

149

150



151 **Table S5.** Direct and Indirect effects of exogenous variables on endogenous variable.

152

|              | Direct effect | Indirect effect              | Net effect  |
|--------------|---------------|------------------------------|-------------|
| $Z_1$ on $Y$ | $\rho_{1y}$   | $\rho_{12} \times \rho_{2y}$ | $\rho_{1y}$ |
| $Z_2$ on $Y$ | $\rho_{2y}$   | $\rho_{12} \times \rho_{1y}$ | $\rho_{2y}$ |

153
